# Supplementary material
Source: MDPI journal article supplement (https://www.mdpi.com/2077-0472/12/12/2102)

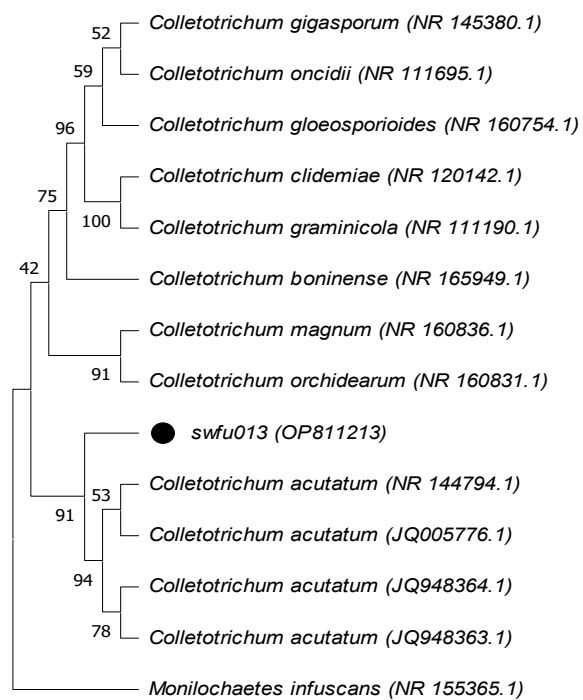

**Figure S1.** The phylogenetic tree of the ITS gene sequence of the *Colletotrichum acutatum* swfu013.

Supplement: s1 [file s1]
